# Supplementary material for: Characterization of Phenolic Compounds in Extra Virgin Olive Oil from Granada (Spain) and Evaluation of Its Neuroprotective Action
Source: MDPI journal article supplement (doi:10.3390/ijms25094878), 2024-04-30
Supplement: s1 [file s1]

## SUPPLEMENTARY MATERIAL

**Table S1.** Tentatively identified compounds, abbreviation, retention time, m/z, molecular formula, error and fragments information.

| Compound                                            | Abbreviation  | TR (min) | m/z      | Molecular formula                              | Error (ppm) | Fragments information                  |
|-----------------------------------------------------|---------------|----------|----------|------------------------------------------------|-------------|----------------------------------------|
| Quinic acid                                         | QuiAc         | 2.1      | 191.0568 | C <sub>7</sub> H <sub>12</sub> O <sub>6</sub>  | -3.43       | 191.0572, 127.0408, 109.0282           |
| 3,4-Dihydroxyphenylglycol                           | DiHyGli       | 4.2      | 169.0514 | C <sub>8</sub> H <sub>10</sub> O <sub>4</sub>  | -4.61       | 123.0453, 122.0372, 108.0235           |
| Vanillic acid                                       | Van           | 7.8      | 167.0359 | C <sub>8</sub> H <sub>8</sub> O <sub>4</sub>   | -5.18       | 123.0455, 108.0218, 109.0296, 122.0365 |
| Hydroxytyrosol                                      | Hyty          | 8.6      | 153.0566 | C <sub>8</sub> H <sub>10</sub> O <sub>3</sub>  | -5.71       | 123.0455, 153.056                      |
| 3-(formylpropenyl) pentanoic acid                   | ForP          | 9.8      | 199.0622 | C <sub>9</sub> H <sub>12</sub> O <sub>5</sub>  | -4.92       | 111.0819, 199.0615, 155.0711, 111.009  |
| Tyrosol                                             | Ty            | 9.9      | 137.061  | C <sub>8</sub> H <sub>10</sub> O <sub>2</sub>  | -1.43       |                                        |
| Elenolic acid isomer 1                              | EA 1          | 10.5     | 241.0729 | C <sub>11</sub> H <sub>14</sub> O <sub>6</sub> | -4.53       | 139.0040, 127.0402, 101.0247, 111.0091 |
| Elenolic acid isomer 2                              | EA 2          | 10.7     | 241.0732 | C <sub>11</sub> H <sub>14</sub> O <sub>6</sub> | -5.74       | 139.0037, 101.0244, 127.0400, 111.0088 |
| Decarboxymethyl dialdehydic acid elenolic acid      | DEDA          | 11.9     | 183.0672 | C <sub>9</sub> H <sub>12</sub> O <sub>4</sub>  | -5.03       |                                        |
| Hydroxydecarboxymethyl oleuropein aglycone isomer 1 | HyDec Ol Ag 1 | 12.8     | 671.2358 | C <sub>17</sub> H <sub>20</sub> O <sub>7</sub> | -3.22       | 151.0405, 335.1142                     |
| Hydroxyoleuropein aglycone isomer 1                 | Hy Ol Ag 1    | 13.5     | 393.1200 | C <sub>19</sub> H <sub>22</sub> O <sub>9</sub> | -2.06       | 151.0407, 123.0455, 139.0044           |
| Trimethoxyphenylacetic acid                         | TMP-Ac        | 14.5     | 225.0782 | C <sub>11</sub> H <sub>14</sub> O <sub>5</sub> | -5.56       | 101.0245, 123.0450                     |
| Hydroxytyrosol acetate                              | Hyty-Ac       | 15.6     | 195.0669 | C <sub>10</sub> H <sub>12</sub> O <sub>4</sub> | -3.08       | 101.0244, 135.0453, 121.0292           |
| Hydroxyelenolic acid                                | Hy-EA         | 17.4     | 257.068  | C <sub>11</sub> H <sub>14</sub> O <sub>7</sub> | -4.82       | 137.0606, 109.0658, 181.0505           |
| Syringaresinol                                      | Syr           | 17.5     | 417.1555 | C <sub>22</sub> H <sub>26</sub> O <sub>8</sub> | -0.02       |                                        |
| Pinoresinol                                         | Pin           | 18.2     | 357.1344 | C <sub>20</sub> H <sub>22</sub> O <sub>6</sub> | -0.11       |                                        |

|                                                     |               |      |          |                                                |       |                                                        |
|-----------------------------------------------------|---------------|------|----------|------------------------------------------------|-------|--------------------------------------------------------|
| Hydroxydecarboxymethyl oleuropein aglycone isomer 2 | Hy-D-Ol-Agl 2 | 18.5 | 335.1149 | C <sub>17</sub> H <sub>20</sub> O <sub>7</sub> | -3.61 | 111.0816, 199.0617,<br>155.0717                        |
| Acetoxypinoresinol                                  | Ac-Pin        | 18.6 | 415.1398 | C <sub>22</sub> H <sub>24</sub> O <sub>8</sub> | 0.1   |                                                        |
| Hydroxyoleuropein aglycone isomer 1                 | Hy-Ol-Ag 1    | 20.5 | 393.1206 | C <sub>19</sub> H <sub>22</sub> O <sub>9</sub> | -3.51 | 151.0396, 111.0083,<br>101.0244, 139.0036              |
| Ligstroside aglycone isomer 1                       | Li-Ag 1       | 20.9 | 361.1306 | C <sub>19</sub> H <sub>22</sub> O <sub>7</sub> | -3.65 |                                                        |
| Methyloleuropein aglycone isomer 1                  | Me-Ol-Ag 1    | 21.1 | 391.1409 | C <sub>20</sub> H <sub>24</sub> O <sub>8</sub> | -2.6  |                                                        |
| Ligstroside aglycone isomer 2                       | Li-Ag 2       | 21.3 | 361.1307 | C <sub>19</sub> H <sub>22</sub> O <sub>7</sub> | -3.93 | 101.0240, 291.0879,<br>111.0089                        |
| Methyloleuropein aglycone isomer 2                  | Me-Ol-Ag 2    | 21.6 | 391.1411 | C <sub>20</sub> H <sub>24</sub> O <sub>8</sub> | -2.91 | 111.0095, 139.0036,<br>115.0401                        |
| Methyloleuropein aglycone isomer 3                  | Me-Ol-Ag 3    | 21.8 | 391.1407 | C <sub>20</sub> H <sub>24</sub> O <sub>8</sub> | -2.27 |                                                        |
| Hydroxydecarboxymethyl ligstroside aglycone         | Hy-D-Li-Agl   | 22.0 | 319.1199 | C <sub>17</sub> H <sub>20</sub> O <sub>6</sub> | -3.33 | 199.0613, 111.0089,<br>111.0817, 155.0713,<br>181.0507 |
| Ligstroside aglycone isomer 3                       | Li-Ag 3       | 22.2 | 361.1314 | C <sub>19</sub> H <sub>22</sub> O <sub>7</sub> | -5.86 | 101.0246, 291.0879,<br>127.0403, 111.0088              |
| Hydroxyoleuropein aglycone isomer 2                 | Hy-Ol-Ag 2    | 22.3 | 393.1206 | C <sub>19</sub> H <sub>22</sub> O <sub>9</sub> | -3.58 |                                                        |
| Ligstroside aglycone isomer 4                       | Li-Ag 4       | 22.5 | 361.131  | C <sub>19</sub> H <sub>22</sub> O <sub>7</sub> | -4.4  | 101.0247, 291.0886,<br>127.0405, 111.0090,<br>292.0917 |
| Methyloleuropein aglycone isomer 4                  | Me-Ol-Ag 4    | 22.6 | 391.1407 | C <sub>20</sub> H <sub>24</sub> O <sub>8</sub> | -2.05 |                                                        |
| Oleuropein aglycone isomer 1                        | Ol-Ag 1       | 23.6 | 751.2268 | C <sub>19</sub> H <sub>20</sub> O <sub>8</sub> | -3.48 | 111.0090, 149.0245,<br>139.0405, 101.0246              |
| Hydroxyoleuropein aglycone isomer 3                 | Hy-D-Ag 3     | 24.8 | 393.1206 | C <sub>19</sub> H <sub>22</sub> O <sub>9</sub> | -3.59 |                                                        |
| Oleuropein aglycone isomer 2                        | Ol-Ag 2       | 25.0 | 377.1256 | C <sub>19</sub> H <sub>22</sub> O <sub>8</sub> | -3.65 | 111.0090, 149.0245,<br>139.0405, 101.0246              |
| Luteolin                                            | Lut           | 25.5 | 285.0421 | C <sub>15</sub> H <sub>10</sub> O <sub>6</sub> | -5.39 | 133.0293, 285.0402,<br>151.0033                        |
| Ligstroside aglycone isomer 5                       | Li-Ag 5       | 26.0 | 361.1308 | C <sub>19</sub> H <sub>22</sub> O <sub>7</sub> | -3.79 | 101.0246, 291.0878,<br>127.0400, 111.0090              |

|                                                         |            |      |          |                                                |       |                                                        |
|---------------------------------------------------------|------------|------|----------|------------------------------------------------|-------|--------------------------------------------------------|
| <b>Methyloleuropein aglycone isomer 5</b>               | Me-Ol-Ag 5 | 26.1 | 391.1414 | C <sub>20</sub> H <sub>24</sub> O <sub>8</sub> | -3.81 | 111.0086, 139.0036,<br>139.0399, 115.0397,<br>141.0556 |
| <b>Oleuropein aglycone isomer 3</b>                     | Ol-Ag 3    | 26.2 | 377.1257 | C <sub>19</sub> H <sub>22</sub> O <sub>8</sub> | -3.75 | 111.009, 101.0247, 139.0039,<br>149.0245, 139.0401     |
| <b>Ligstroside aglycone isomer 6</b>                    | Li-Ag 6    | 26.3 | 361.1305 | C <sub>19</sub> H <sub>22</sub> O <sub>7</sub> | -3.05 | 101.0249, 291.0878,<br>127.0404, 111.0091,<br>292.0910 |
| <b>Elenolic decarboxymethyl dialdehydic acid acetal</b> | DEDA-Ac    | 26.4 | 365.1618 | C <sub>19</sub> H <sub>26</sub> O <sub>7</sub> | -3.28 |                                                        |
| <b>Methyloleuropein aglycone isomer 6</b>               | Me-Ol-Ag 6 | 26.5 | 391.1409 | C <sub>20</sub> H <sub>24</sub> O <sub>8</sub> | -2.4  | 111.0086, 139.0036,<br>115.0397, 141.0556              |
| <b>Apigenin</b>                                         | Api        | 26.7 | 269.0466 | C <sub>15</sub> H <sub>10</sub> O <sub>5</sub> | -3.71 | 117.0348, 269.0458,<br>151.0038, 149.0245              |
| <b>Oleuropein aglycone isomer 4</b>                     | Ol-Ag 4    | 26.7 | 377.1257 | C <sub>19</sub> H <sub>22</sub> O <sub>8</sub> | -3.72 | 111.0086, 139.0402,<br>139.0036, 101.0245,<br>149.0243 |
| <b>Ligstroside aglycone isomer 7</b>                    | Li-Ag 7    | 27.0 | 361.1311 | C <sub>19</sub> H <sub>22</sub> O <sub>7</sub> | -5.04 |                                                        |

**Table S2.** Calibration parameters for standards used in the quantification.

| Compound | Calibration range<br>( $\mu\text{g mL}^{-1}$ ) | Calibration curve                     | R <sup>2</sup> | LOD<br>( $\mu\text{g mL}^{-1}$ ) | LOQ<br>( $\mu\text{g mL}^{-1}$ ) |
|----------|------------------------------------------------|---------------------------------------|----------------|----------------------------------|----------------------------------|
| BenAc    | 1–40                                           | $y = -59.9 x^2 + 7467.6 x + 11136$    | 0.9962         | 0.55                             | 1.64                             |
| Hyty     | 1–150                                          | $y = -242 x^2 + 97878 x + 80667$      | 0.9987         | 0.07                             | 0.20                             |
| Ty       | 1–40                                           | $y = 74.6 x^2 + 32965 x - 10370$      | 0.9989         | 0.14                             | 0.42                             |
| Lut      | 1–40                                           | $y = -3209.1 x^2 + 355617 x + 401034$ | 0.9969         | 0.02                             | 0.06                             |
| Ol       | 1–150                                          | $y = -237.4 x^2 + 74636 x + 264040$   | 0.9943         | 0.05                             | 0.16                             |
| Pin      | 1–40                                           | $y = -661.7 x^2 + 104606 x + 5319.7$  | 0.9990         | 0.02                             | 0.06                             |
| QuinAc   | 1–40                                           | $y = -417.1 x^2 + 123852 x + 21480$   | 0.9963         | 0.04                             | 0.12                             |
| Van      | 1–40                                           | $y = -607.2 x^2 + 64345 x + 39052$    | 0.9960         | 0.06                             | 0.19                             |

*BenAc, benzylic acid; Hyty, hydroxytyrosol; Ty, tyrosol; Lut, luteoline; Ol, oleuropeine; Pin, pinosresinol; QuinAc, quinic acid; Van, vanillic acid; LOD, limit of detection; LOQ, limit of quantification.*
